# Supplementary material
Source: publisher figshare collection journal article supplement (https://frontiersin.figshare.com/ndownloader/files/15681731)
Supplement: Supplementary file [file 15681731]

### Supplementary figure 2

Western blot analysis of immune proteins in spleen tissue at 4wks post-NCSE

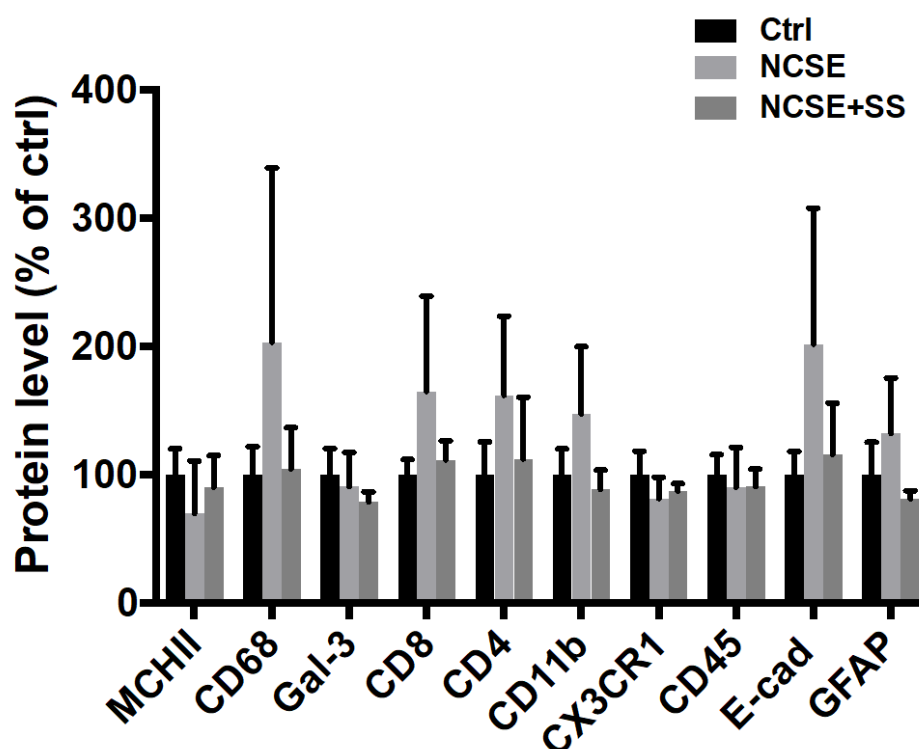

**S2 Figure. Western blot analysis of spleen tissue 4wks following NCSE with or without additional spontaneous seizures.** Data (mean  $\pm$  standard error of mean) are presented as percentage change relative to Ctrl and normalized to either b-actin (42 kDa) or glyceraldehyde-3-phosphate dehydrogenase (37 kDa). Ctrl; n = 7-12, NCSE; n = 4, NCSE+SS; n=10-12. NCSE+SS, NCSE with spontaneous seizures; MHCII, major histocompatibility complex; Gal-3, galectin-3, E-cad, E-cadherin; GFAP, anti-glial fibrillary acidic protein. \*p < 0.05, unpaired t test.
